# Supplementary material for: Comparative Analysis of Butternut (Juglans cinerea) and Japanese Walnut (Juglans ailantifolia) Chloroplast Genomes
Source: Research Square preprint supplement (doi:10.21203/rs.3.rs-6206868/v1), 2025-05-07
Supplement: Supplementary file 1 [file 078690a6788368a71f4f4d90.docx]

| Primer’s sequence | Gene | Start  Position  amplicon | End  Position  amplicon | Amplicon length | SNP position in CDS | Restriction enzyme | Fragments in JC after digestion | Fragments in JA after digestion |
| --- | --- | --- | --- | --- | --- | --- | --- | --- |
| F: GGCAACATGACTTCCTATACCCACT | matK | 41 | 236 | 196 | 117 | *Bgl*II | 79/117 | 196 |
| R:TGGTTAGAATCATTAGTGGAAATCAGCA |  |  |  |  |  |  |  |  |
| F: TGAAAGATGCCTCCTCTTTGCAT | matK | 500 | 691 | 191 | 666& | BsaJI | 191 | 166/25 |
| R: GAGAAGATTGTTTACGGAGACCAAG |  |  |  |  |  |  |  |  |
| F: CTAAATACTTCAATGGTGCGGAGTC | matK | 1015 | 1503 | 489 | 1398 | BsaJI | 489 | 109/379 |
| R: CCGCCCATTGATGCAAATAATATCT |  |  |  |  |  |  |  |  |
| F: TCATACGTGTMAAAGTGATGGA | YCF1 | 1170 | 1500 | 330 | 1375 | *Xba*I | 330 | 204/126 |
| R: CGAAAGGGTCCGTTAAATAAAGAAT |  |
| F: TCATACGTGTMAAAGTGATGGA | YCF1 | 1170 | 1953 | 783 | 1542 | *Esp3*I | 377/406 | 783 |
| R: TCTTCAGTTGCTACTTCCTGTT |  |
| F: CCTTTACGTATCCRCCAAGTTTATC | YCF1 | 1205 | 1758 | 553 | 1578 | *Psi*I | 553 | 374/179 |
| R: TCCGGAAATAAATAAAGTCCTTTCAA |  |
| F: GTCCGGAGAATACCGATACTAATG | YCF1 | 2018 | 2664 | 646 | 2473 | *Dde*I | 646 | 456/190 |
| R: TGAATACCGTCTSTTAACCAGTTT |  |
| F: GAGGTGGCTTTGATACGTTATTC | YCF1 | 2074 | 2813 | JC:739 | 2651 | *Hpa*I | 739 | 575/155 |
| R: AAGGTAATTCAGTTTCCATTCCC |  | JA:730 |
| F: CCATAATCAAATTATTCCYGAATCGTC | YCF1 | 3114 | 3693 | 579 | 3225 | *Psi*I | 579 | 113/466 |
| R: CTGACTTGGATTTGTGAGAATTTGTAG |  |
| F: CCATAATCAAATTATTCCYGAATCGTC | YCF1 | 3114 | 3693 | 579 | 3489 | DraI | 288/291 | 288/87/204 |
| R: CTGACTTGGATTTGTGAGAATTTGTAG |  |
| F: CTCGAGAGATAAATATTAGCCAGACC | YCF1 | 3275 | 3800 | 525 | 3659 | *Nde*I | 383/142 | 525 |
| R: CGGAATCAAATATTCCTTGCGTT |  |
| F: TCTCACAAATCCAAGTCAGTAAC | YCF1 | 3674 | 4218 | 544 | 3900 | *Xba*I | 544 | 225/319 |
| R: AGTTTACGTTTAGSCGTATTGT |  |

**Supplementary Table 5.** Sequences of potential CAPS marker primers designed for the matK and ycf1 genes. The table includes the start and end positions of the amplicons, suitable restriction enzymes, and SNP positions. In the "Fragments After Digestion" columns, each slash (/) represents a restriction site of the corresponding enzyme within the amplicon. The numbers before and after the slash indicate the expected fragment sizes resulting from amplicon digestion. JC refer to *J. cinerea*, JA refer to *J. ailantifolia*. & dCAPS markers.
