# Supplementary material for: Comparative Analysis of Butternut (Juglans cinerea) and Japanese Walnut (Juglans ailantifolia) Chloroplast Genomes
Source: Research Square preprint supplement (doi:10.21203/rs.3.rs-6206868/v1), 2025-05-07
Supplement: Supplementary file 2 [file 5078ca0d6a08f77aa17b5d21.xlsx]

## Sheet: Sheet1
No.	Gene	Toral SNP	Unique SNP	Unique SNPs Positions: Genome	Unique SNPs Positions:CDS	Unique SNPs JA	Unique SNPs JC	Codon in J.ailantifolia	Codon in J.cinerea	Amino Acid: JA/JC
1	psbA	1	1	825	546	G	A	TTC	TTT	F/F
2	matK	40	5	2069	1398	C	T	GAG	GAA	E/E
				2206	1261	G	T	CAA	AAA	Q/K
				2801	666	G	T	TTC	TTA	F/L
				3177	290	C	A	GGA	GTA	G/V
				3350	117	C	T	AGG	AGA	R/R
3	atpA	6	1	11883	1360	T	C	ATA	GTA	I/V
4	atpI	1	1	16876	485	T	C	GAT	GAA	D/E
5	rpoc2	19	4	19550	3173	C	T	CGT	CAT	R/H
				19862	2861	C	T	CGA	CAA	R/Q
				20484	2239	A	G	TTT	CTT	F/L
				22507	216	T	C	AAA	AAG	K/K
6	rpoB	12	5	26731	2301	T	C	GTA	GTG	V/V
				27274	1758	C	T	AAG	AAA	K/K
				27531	1501	G	A	CAC	TAC	H/Y
				28464	568	G	T	CAT	AAT	H/N
				28993	39	G	A	CCC	CCT	P/P
7	psaB	6	1	43309	735	G	A	GGC	GGT	G/G
8	rps4	3	2	50864	94	G	C	CTT	GTT	L/V
				50865	93	G	A	GAC	GAT	D/D
9	ndhJ	1	1	55563	183	T	C	CCA	CCG	P/P
11	accD	11	4	62789	372	T	G	TTT	GTT	F/V
				62955	538	G	A	GAC	AAC	D/N
				63008	591	C	T	AAC	AAT	N/N
				63449	1032	C	A	GGC	GGA	G/G
12	cemA	7	6	66229	57	G	A	TTG	TTA	L/L
				66362	190	A	G	AAG	GAG	K/E
				66613	441	C	T	GAC	GAT	D/D
				66730	558	C	T	AAC	AAT	N/N
				66787	615	T	A	TTT	TTA	F/L
				66807	635	A	T	TAT	TTT	Y/F
13	petA	3	1	67348	273	T	G	ATT	ATG	I/M
14	psbL	1	1	69523	15	A	G	AAT	AAC	N/N
15	psaJ	1	1	72570	62	T	C	TTT	TCT	F/S
16	psbC	7	4	38355	1216	A	G	TCC	CCC	S/P
				38770	801	G	A	TCC	TCT	S/S
				39117	454	C	T	GAA	AAA	E/K
17	rps18	3	1	73701	228	C	T	CCC	CCT	P/P
18	clpP	1	1	77537	27	A	G	CCT	CCC	P/P
19	psi/psbB	3	1	78851	792	G	C	CCG	CCC	P/P
20	psbH	2	1	80392	210	T	C	ATT	ATC	I/I
21	rpoA	7	2	83644	921	A	C	TTT	ATG	F/M
22	rps11	1	1	84734	312	T	C	GCA	GCG	A/A
23	rps8	2	1	85949	224	T	G	AAT	ACT	N/T
24	rpl14	2	2	86388	348	C	T	TCG	TCA	S/S
				86392	344	G	A	GCT	GTT	A/V
25	rpl22	7	3	89196	323	T	C	AAA	AGA	K/R
				89230	289	T	G	ACT	CCT	T/P
				89259	260	G	T	ACC	AAC	T/N
26	ndhF	15	9	116100	2135	C	A	GGT	GTT	G/V
				116582	1653	T	G	CTA	CTC	L/L
				116795	1440	A	T	GGT	GGA	G/G
				116803	1432	G	A	CTA	TTA	L/L
				117046	1189	A	C	TCT	GCT	S/A
				117235	1000	G	A	CTA	TTA	L/L
				117242	993	T	C	ATA	ATG	I/M
				117356	879	C	T	ATG	ATA	M/I
				118068	167	G	A	GCC	GTC	A/V
27	ccsA	6	1	121008	906	A	G	CTA	CTG	L/L
28	ndhD	12	6	121787	1105	C	T	GAA	AAA	E/K
				121839	1053	G	A	ACT	CTT	T/L
				121847	1045	T	C	ACT	GCT	T/A
				122415	477	G	A	TCC	TCT	S/S
				122846	46	T	C	ATG	GTG	M/V
29	ndhG	3	2	124324	260	T	G	TAC	TCC	Y/S
				124398	186	C	T	CAG	CAA	Q/Q
30	ndhA	4	1	127715	85	T	C	ACG	GCG	T/A
31	ndhH	7	3	127987	996	A	G	GCT	GCC	A/A
				128099	884	G	A	TCT	TTT	S/F
				128728	255	T	C	GGA	GGG	G/G
32	ycf1	84	38	129813	5671	C	A	GAT	TAT	D/Y
				130038	5446	G	A	CAT	TAT	H/Y
				130126	5358	A	C	TTT	TTG	F/L
				130600	4884	T	G	AAA	AAC	K/N
				130656	4828	T	G	AAA	CAA	K/Q
				130733	4751	G	T	ACT	AAT	T/N
				130744	4740	G	C	TCC	TCG	S/S
				130783	4701	G	T	AGC	AGA	S/R
				130847	4637	A	G	GTC	GCC	V/A
				131446	4038	C	T	ATG	ATA	M/I
				131584	3900	A	G	TCT	TCC	S/S
				131825	3659	C	T	TGT	TAT	C/Y
				131995	3489	A	T	TTT	TTA	F/L
				132095	3389	G	A	TCA	TTA	S/L
				132259	3225	A	G	ATT	ATC	I/I
				132282	3202	T	G	ATA	CTA	I/L
				132387	3097	T	C	AAA	GAA	K/E
				132833	2651	G	C	ACA	AGA	T/R
				132976	2508	T	A	ATA	ATT	I/I
				133011	2473	G	T	CTT	ATT	L/I
				133120	2364	T	G	AGA	AGC	R/S
				133170	2314	G	A	CAT	TAT	H/Y
				133192	2292	C	A	AAG	AAT	K/N
				133287	2197	G	C	CCC	GCC	P/A
				133616	1868	C	G	GGA	GCA	G/A
				133681	1803	A	C	TGT	TGG	C/W
				133710	1774	G	T	CTT	ATT	L/I
				133756	1728	T	G	TTA	TTC	L/F
				133770	1714	A	G	TCA	CCA	S/P
				133787	1697	A	C	ATC	AGC	I/S
				133906	1578	A	C	TTT	TTG	F/L
				133942	1542	A	C	ACT	ACG	T/T
				134109	1375	G	A	CTA	TTA	L/L
				134137	1347	A	G	AAT	AAC	N/N
				134304	1180	T	G	AAA	CAA	K/Q
				134334	1150	T	C	AAA	GAA	K/E
				134374	1110	T	G	CGA	CGC	R/R

## Sheet: Sheet2
Gene	Amino Acid: JA/JC
psbA	F/F
matK	E/E
matK	Q/K
matK	F/L
matK	G/V
matK	R/R
atpA	I/V
atpI	D/E
rpoc2	R/H
rpoc2	R/Q
rpoc2	F/L
rpoc2	K/K
rpoB	V/V
rpoB	K/K
rpoB	H/Y
rpoB	H/N
rpoB	P/P
psaB	G/G
rps4	L/V
rps4	D/D
ndhJ	P/P
accD	F/V
accD	D/N
accD	N/N
accD	G/G
cemA	L/L
cemA	K/E
cemA	D/D
cemA	N/N
cemA	F/L
cemA	Y/F
petA	I/M
psbL	N/N
psaJ	F/S
psbC	S/P
psbC	S/S
psbC	E/K
rps18	P/P
clpP	P/P
psi/psbB	P/P
psbH	I/I
rpoA	F/M
rps11	A/A
rps8	N/T
rpl14	S/S
rpl14	A/V
rpl22	K/R
rpl22	T/P
rpl22	T/N
ndhF	G/V
ndhF	L/L
ndhF	G/G
ndhF	L/L
ndhF	S/A
ndhF	L/L
ndhF	I/M
ndhF	M/I
ndhF	A/V
ccsA	L/L
ndhD	E/K
ndhD	T/L
ndhD	T/A
ndhD	S/S
ndhD	M/V
ndhG	Y/S
ndhG	Q/Q
ndhA	T/A
ndhH	A/A
ndhH	S/F
ndhH	G/G
ycf1	D/Y
ycf1	H/Y
ycf1	F/L
ycf1	K/N
ycf1	K/Q
ycf1	T/N
ycf1	S/S
ycf1	S/R
ycf1	V/A
ycf1	M/I
ycf1	S/S
ycf1	C/Y
ycf1	F/L
ycf1	S/L
ycf1	I/I
ycf1	I/L
ycf1	K/E
ycf1	T/R
ycf1	I/I
ycf1	L/I
ycf1	R/S
ycf1	H/Y
ycf1	K/N
ycf1	P/A
ycf1	G/A
ycf1	C/W
ycf1	L/I
ycf1	L/F
ycf1	S/P
ycf1	I/S
ycf1	F/L
ycf1	T/T
ycf1	L/L
ycf1	N/N
ycf1	K/Q
ycf1	K/E
ycf1	R/R
