# Supplementary material for: Comparative Analysis of Butternut (Juglans cinerea) and Japanese Walnut (Juglans ailantifolia) Chloroplast Genomes
Source: Research Square preprint supplement (doi:10.21203/rs.3.rs-6206868/v1), 2025-05-07
Supplement: Supplementary file 3 [file f1592f7e4782d728fcc60500.xlsx]

## Sheet: Sheet1
Japanese walnut	Butternut	Black walnut	Copy
rps12	rps12	rps12	2
trnH-GUG	trnH-GUG	trnH-GUG	2
psbA	psbA	psbA	2
trnK-UUU	trnK-UUU	trnK-UUU	2
matK	matK	matK	2
rps16	rps16	rps16	2
trnQ-UUG	trnQ-UUG	trnQ-UUG	2
psbK	psbK	psbK	2
psbI	psbI	psbI	2
trnS-GCU	trnS-GCU	trnS-GCU	4
trnR-UCU	trnR-UCU	trnR-UCU	2
atpA	atpA	atpA	2
atpF	atpF	atpF	2
atpH	atpH	atpH	2
atpI	atpI	atpI	2
rps2	rps2	rps2	2
rpoC2	rpoC2	rpoC2	2
rpoC1	rpoC1	rpoC1	2
rpoB	rpoB	rpoB	2
trnC-GCA	trnC-GCA	trnC-GCA	2
petN	petN	petN	2
psbM	psbM	psbM	2
trnD-GUC	trnD-GUC	trnD-GUC	2
trnY-GUA	trnY-GUA	trnY-GUA	2
trnE-UUC	trnE-UUC	trnE-UUC	2
trnT-GGU	trnT-GGU	trnT-GGU	2
trnM-CAU			2
psbD	psbD	psbD	2
psbC	psbC	psbC	2
trnS-UGA	trnS-UGA	trnS-UGA	2
lhbA	lhbA	lhbA	2
trnG-UCC	trnG-UCC	trnG-UCC	2
trnfM-CAU	trnfM-CAU	trnfM-CAU	2
rps14	rps14	rps14	2
psaB	psaB	psaB	2
psaA	psaA	psaA	2
ycf3	ycf3	ycf3	2
trnS-GGA	trnS-GGA	trnS-GGA	2
rps4	rps4	rps4	2
trnT-UGU	trnT-UGU	trnT-UGU	2
trnL-UAA	trnL-UAA	trnL-UAA	2
trnF-GAA	trnF-GAA	trnF-GAA	2
ndhJ	ndhJ	ndhJ	2
ndhK	ndhK	ndhK	2
ndhC	ndhC	ndhC	2
trnV-UAC	trnV-UAC	trnV-UAC	2
trnM-CAU	trnM-CAU	trnM-CAU	2
trnT-GGU			2
atpE	atpE	atpE	2
atpB	atpB	atpB	2
rbcL	rbcL	rbcL	2
accD	accD	accD	2
psaI	psaI	psaI	2
ycf4	ycf4	ycf4	2
cemA	cemA	cemA	2
petA	petA	petA	2
psbJ	psbJ	psbJ	2
psbL	psbL	psbL	2
psbF	psbF	psbF	2
psbE	psbE	psbE	2
petL	petL	petL	2
petG	petG	petG	2
trnW-CCA	trnW-CCA	trnW-CCA	2
trnP-UGG	trnP-UGG	trnP-UGG	2
trnP-GGG			2
psaJ	psaJ	psaJ	2
rpl33	rpl33	rpl33	2
rps18	rps18	rps18	2
rpl20	rpl20	rpl20	2
rps12	rps12	rps12	2
clpP	clpP	clpP	2
psi	psbB	psbB	2
psbT	psbT	psbT	2
psbN	psbN	psbN	2
psbH	psbH	psbH	2
petB	petB	petB	2
petD	petD	petD	2
rpoA	rpoA	rpoA	2
rps11	rps11	rps11	2
rpl36	rpl36	rpl36	2
infA			2
rps8	rps8	rps8	2
rpl14	rpl14	rpl14	2
rpl16	rpl16	rpl16	2
rps3	rps3	rps3	2
rpl22	rpl22	rpl22	2
rps19	rps19	rps19	2
rpl2	rpl2	rpl2	2
rpl23	rpl23	rpl23	2
trnI-CAU	trnI-CAU	trnI-CAU	2
ycf2	ycf2	ycf2	2
ycf15			2
trnL-CAA	trnL-CAA	trnL-CAA	2
ndhB	ndhB	ndhB	2
rps7	rps7	rps7	2
rps12			2
trnV-GAC	trnV-GAC	trnV-GAC	2
trnI-GAU	trnI-GAU	trnI-GAU	2
trnA-UGC	trnA-UGC	trnA-UGC	2
trnR-ACG	rrn16	rrn16	2
trnN-GUU	trnN-GUU	trnN-GUU	2
	trnR-ACG	trnR-ACG	2
ycf1			2
ndhF	ndhF	ndhF	2
rpl32	rpl32	rpl32	2
trnL-UAG	trnL-UAG	trnL-UAG	2
ccsA	ccsA	ccsA	2
ndhD	ndhD	ndhD	2
psaC	psaC	psaC	2
ndhE	ndhE	ndhE	2
ndhG	ndhG	ndhG	2
ndhI	ndhI	ndhI	2
ndhA	ndhA	ndhA	2
ndhH	ndhH	ndhH	2
rps15	rps15	rps15	2
ycf1	ycf1	ycf1	2
trnN-GUU	trnN-GUU	trnN-GUU	2
trnR-ACG	trnR-ACG	trnR-ACG	2
trnA-UGC	trnA-UGC	trnA-UGC	2
trnI-GAU	trnI-GAU	trnI-GAU	2
trnV-GAC	trnV-GAC	trnV-GAC	2
rps7	rps7	rps7	2
ndhB	ndhB	ndhB	2
trnL-CAA	trnL-CAA	trnL-CAA	2
ycf15			2
ycf2	ycf2	ycf2	2
trnI-CAU	trnI-CAU	trnI-CAU	2
rpl23	rpl23	rpl23	2
rpl2	rpl2		2
rrn5	rrn5	rrn5	4
rrn4.5	rrn4.5	rrn4.5	4
rrn23	rrn23	rrn23	4
rrn16	rrn16	rrn16	2
